# Supplementary material for: Analysis of protein glycation using fluorescent phenylboronate gel electrophoresis
Source: PubMed Central journal article supplement — Sci Rep. 2013 Mar 27;3:1437. doi: 10.1038/srep01437 (PMC3609018; doi:10.1038/srep01437), 2013-03-27
Supplement: srep01437-s1.pdf [file srep01437-s1.pdf]

## Supplementary Information for:

### *Analysis of protein glycation using fluorescent phenylboronate gel electrophoresis*

Marta P. Pereira Morais<sup>1\*</sup>, Dominic Marshall<sup>1</sup>, Stephen E. Flower<sup>2</sup>, Christopher J. Caunt<sup>1</sup>,  
Tony D. James<sup>2</sup>, Robert J. Williams<sup>1</sup>, Nicholas R. Waterfield<sup>1</sup>, and Jean M.H. van den Elsen<sup>1\*</sup>

<sup>1</sup> Department of Biology and Biochemistry, University of Bath, Bath, BA2 7AY, U.K.

<sup>2</sup> Department of Chemistry, University of Bath, Bath, BA2 7AY, U.K.

\*Address correspondence to: Jean van den Elsen ([J.M.H.V.Elsen@bath.ac.uk](mailto:J.M.H.V.Elsen@bath.ac.uk)) or Marta Pereira Morais ([mppm20@bath.ac.uk](mailto:mppm20@bath.ac.uk))

This PDF file includes:

Supplementary Figures S1 to S5

Supplementary Table S1

**Contents of Supplementary Information, Pereira Morais *et al.*,:**  
***Analysis of protein glycation using fluorescent phenylboronate gel***  
***electrophoresis***

**Supplementary Figures**

- Figure S1**                      **Chemical structures of the fluorescent boronic acids**
- Figure S2**                      **Fluorescein-boronic acid labelled serum analysed by mP-AGE**
- Figure S3**                      **Flu-PAGE analysis of diabetic serum**
- Figure S4**                      **Quantitative fluorescence intensity analysis of *Manduca sexta***  
**hemolymph**
- Figure S5**                      **Flu-PAGE analysis of TASTPM and wildtype mouse brain**  
**homogenates**

**Supplementary Table**

- Table S1**                      **Glycated proteins identified by Flu-PAGE**

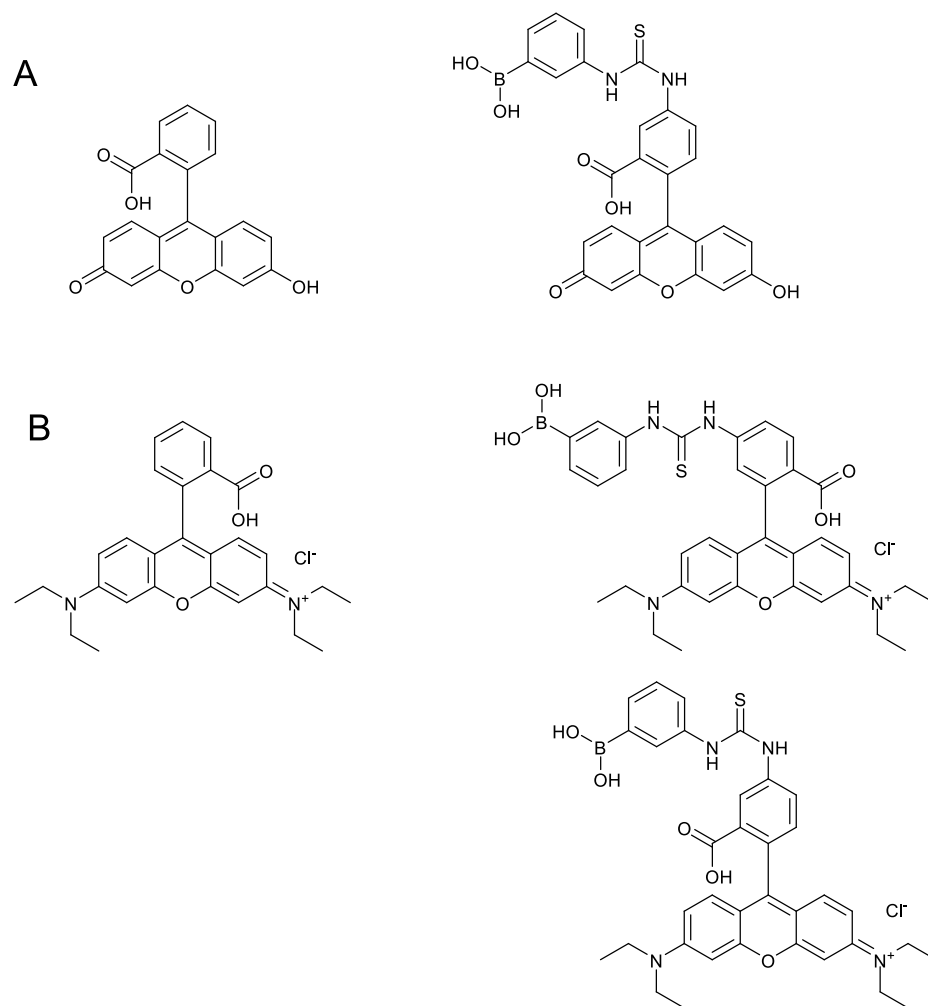

**Figure S1. Chemical structures of the fluorescent labels. (A)** Fluorescein (left) and fluorescein-boronic acid (right), **(B)** rhodamine (left) and rhodamine-boronic acid (mixed isomers; top right, 5-isomer; bottom right, 6-isomer) structures generated using ChemDraw (CambridgeSoft).

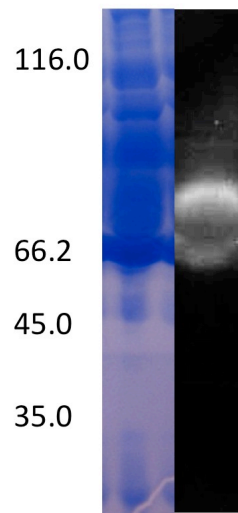

**Figure S2. Fluorescein-boronic acid labelled serum analysed by mP-AGE.** mP-AGE gel profile of human serum labelled with fluorescein-boronic acid when imaged with UV prior to protein staining (right) and after Coomassie stain (left).

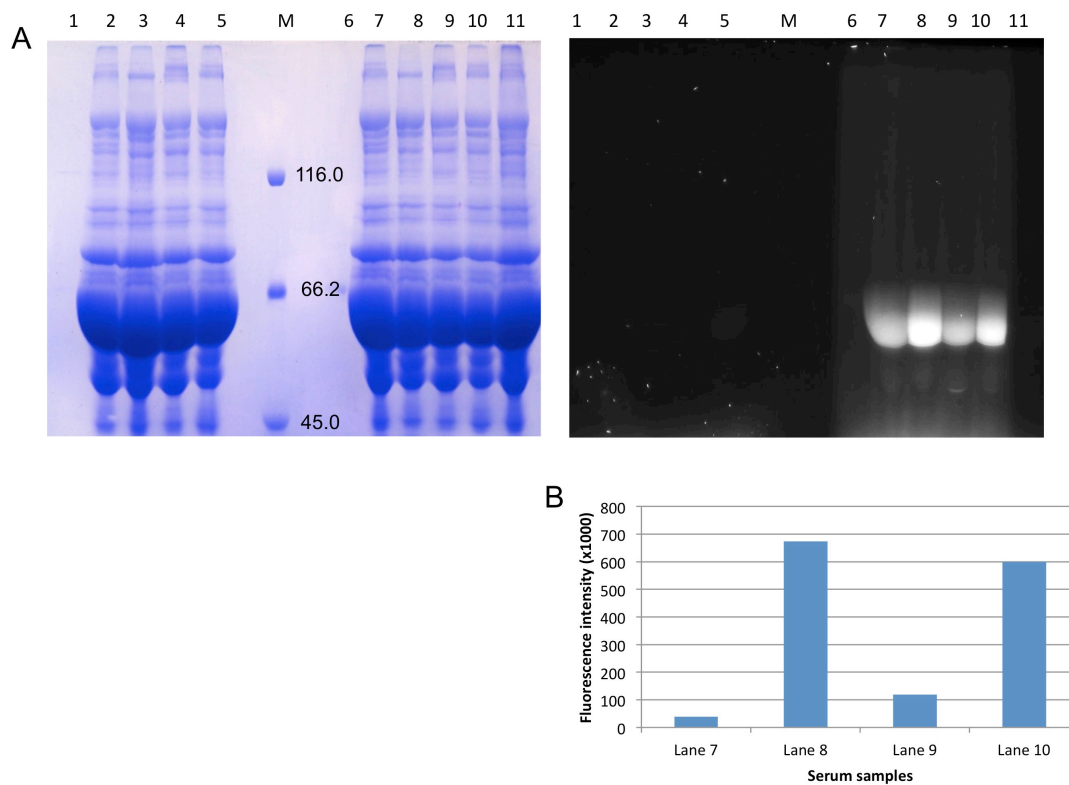

**Figure S3. Flu-PAGE analysis of diabetic serum.** **(A)** 8 % SDS-PAGE of fluorescein (lanes 2-5) and fluorescein boronic acid labelled samples (lanes 7-11), control serum (lanes 2 and 7) and type 1 diabetes human sera of three individuals (lanes 3-5 and 8-10). Lanes 1 and 6 show the labels of fluorescein and fluorescein-boronic acid respectively. Lane 11 shows unlabelled control human serum. Gel was visualised and imaged with UV (365 nm and green filter 537 nm) on Alphamager (right), and Coomassie stained (left). **(B)** shows relative fluorescence intensity of the HSA band in serum samples labelled with fluorescein-boronic acid. The fluorescence intensity values are corrected for protein concentration as determined by Coomassie stain, using TotalLab Quant.

A

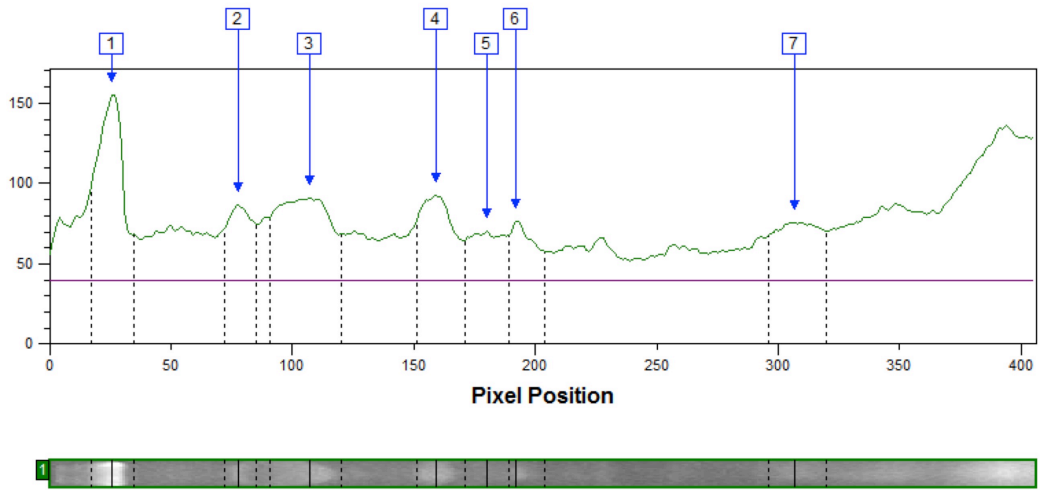

B

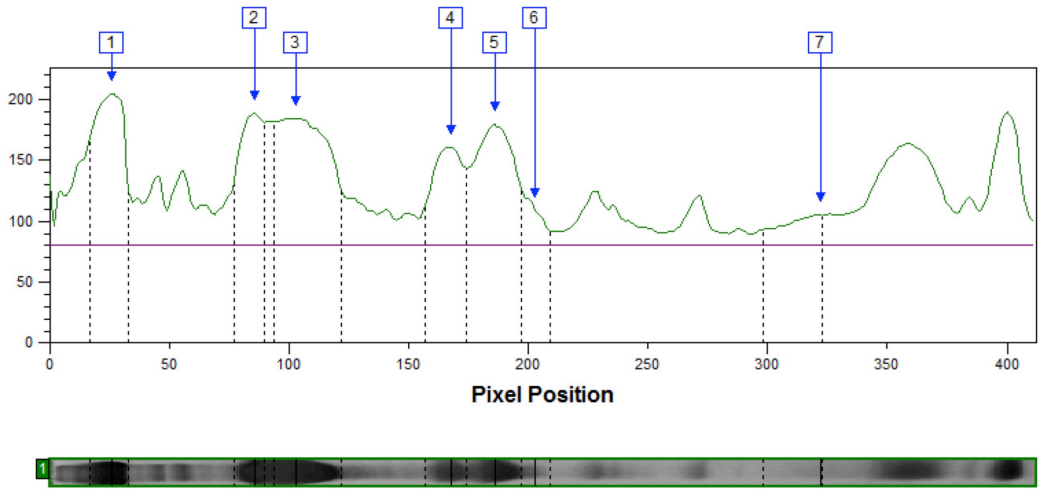

C

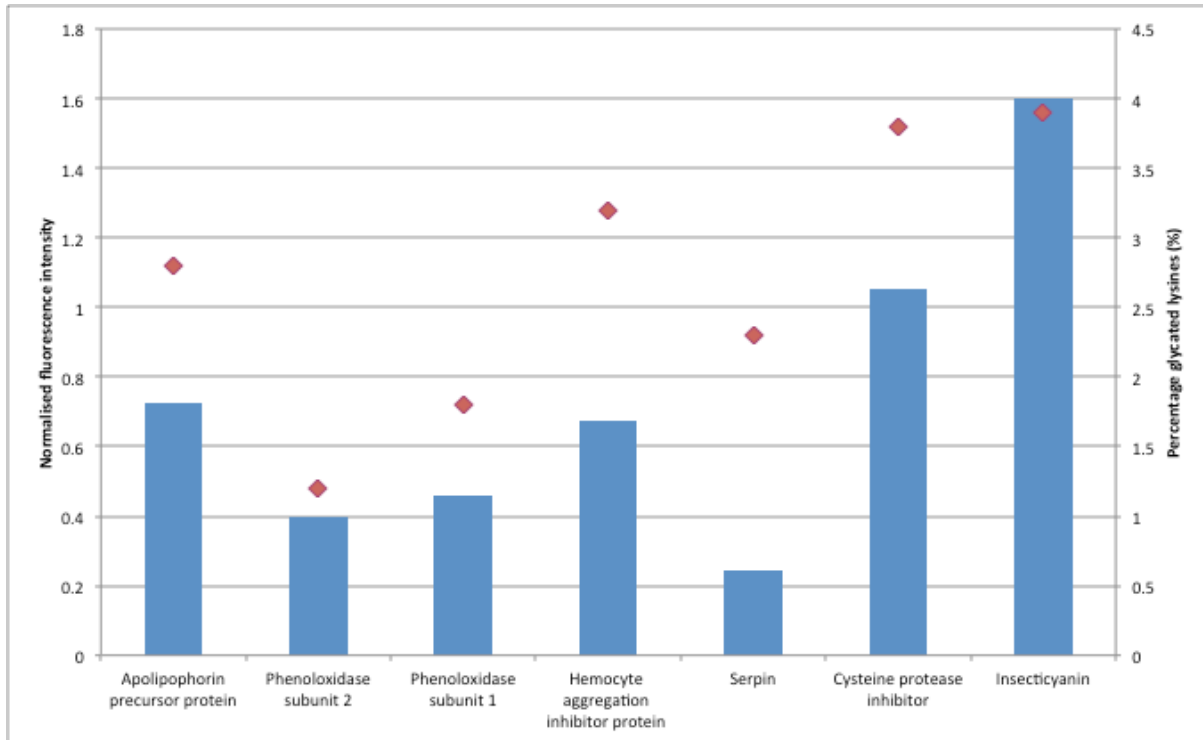

**Figure S4. Quantitative fluorescence intensity analysis of *Manduca sexta* hemolymph.** Comparative analysis of protein band intensities of hemolymph SDS-PAGE profiles in Flu-PAGE (A) and subsequent Coomassie stained gel (B). The gel intensity profiles shown were produced using TotalLab Quant. The identified intensity peaks correspond to **1) apolipoporphin precursor protein**, **2) pro-phenoloxidase subunit 2**, **3) pro-phenoloxidase subunit 1**, **4) hemocyte aggregation inhibitor protein precursor**, **5) serpin 1**, **6) putative C1A cysteine protease precursor** and **7) insecticyanin**.

Graph C shows the fluorescence intensity of glycosylated protein bands (blue bars) that have been normalised with respect to their corresponding Coomassie stain intensity. The percentages of glycosylated lysines (see **Supplementary Table S1**) in the respective proteins are shown as diamonds.

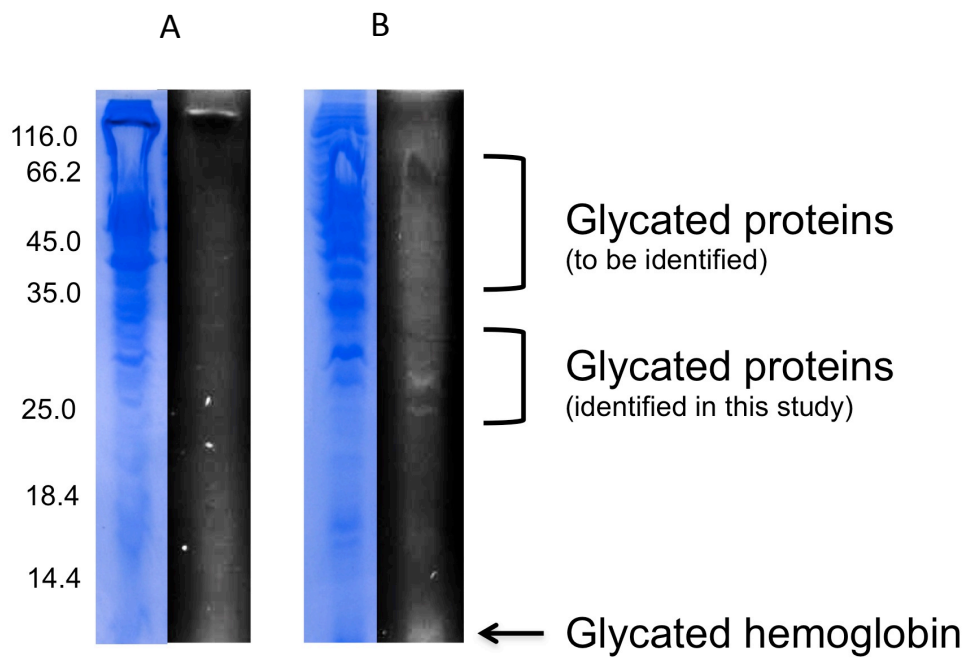

**Figure S5. Flu-PAGE analysis of TASTPM and wildtype mouse brain homogenates.** Flu-PAGE analysis of wild type (**A**) and TASTPM (**B**) mouse cortex homogenates. The gel was visualised with UV (left) prior to Coomassie staining (right). There are many more fluorescent protein bands in the TASTPM affected mouse sample compared to the age-matched control. Proteins that were analysed by MS were indicated.



**Table S1. Glycated proteins identified by Flu-PAGE.**

| <i>Protein</i>                                          | <i>Database number</i> | <i>MW (kDa)</i> | <i>Number of amino acids</i> | <i>Number of K/glycated K*</i> | <i>Number of glycated K/total amino acids (%)</i> |
|---------------------------------------------------------|------------------------|-----------------|------------------------------|--------------------------------|---------------------------------------------------|
| <b><i>Manduca sexta</i> hemolymph</b>                   |                        |                 |                              |                                |                                                   |
| <i>apolipoporphin precursor protein</i>                 | AAB53254.1             | 367             | 3305                         | 282/92 (33%)                   | 2.8                                               |
| <i>pro-phenoloxidase subunit 2</i>                      | Q25519.3               | 80              | 695                          | 31/8 (26%)                     | 1.2                                               |
| <i>pro-phenoloxidase subunit 1</i>                      | O44249                 | 79              | 685                          | 27/12 (44%)                    | 1.8                                               |
| <i>hemocyte aggregation inhibitor protein precursor</i> | ACW82749.1             | 48              | 434                          | 28/14 (50%)                    | 3.2                                               |
| <i>serpin 1</i>                                         | AAC47343.1             | 43              | 392                          | 34/9 (26%)                     | 2.3                                               |
| <i>putative C1A cysteine protease precursor</i>         | CAX16635.1             | 38              | 342                          | 29/13 (45%)                    | 3.8                                               |
| <i>insecticyanin</i>                                    | CAA45969.1             | 23              | 206                          | 19/9 (47%)                     | 4.4                                               |
| <b>TASTPM cortex homogenates</b>                        |                        |                 |                              |                                |                                                   |
| <i>14-3-3 ε</i>                                         | P62259                 | 29              | 255                          | 18/3 (17%)                     | 1.2                                               |
| <i>14-3-3 ζ/δ</i>                                       | P63101                 | 28              | 245                          | 20/11 (55%)                    | 4.5                                               |
| <i>Triose phosphate isomerase</i>                       | CAA37420.1             | 27              | 249                          | 20/5 (25%)                     | 2.0                                               |
| <i>glutathione S-transferase Mu1</i>                    | P10649                 | 26              | 218                          | 18/4 (22%)                     | 1.8                                               |
| <i>glutathione S-transferase P1</i>                     | P19157                 | 24              | 210                          | 12/6 (50%)                     | 2.9                                               |
| <i>Hemoglobin α</i>                                     | P01942.2               | 15              | 142                          | 22/11 (50%)                    | 7.7                                               |
| <i>β</i>                                                | P02088.2               | 16              | 147                          |                                |                                                   |
| <b>Human serum</b>                                      |                        |                 |                              |                                |                                                   |
| <i>serotransferrin</i>                                  | P02787.3               | 77              | 698                          | 58/18 (31%)                    | 2.6                                               |
| <i>serum albumin</i>                                    | P02768                 | 69              | 609                          | 60/24 (40%)                    | 3.9                                               |
| <i>IgG heavy chain</i>                                  | AAA02914.1             | 52              | 476                          | 32/18 (56%)                    | 3.8                                               |
| <i>apolipoprotein A-I</i>                               | P02647.1               | 31              | 267                          | 22/9 (41%)                     | 3.4                                               |

\*Analysis and prediction of mammalian protein glycation. Johansen MB, Kierner L and Brunak S, *Glycobiology*, 16:844-853, 2006.
